# Supplementary material for: Visualization of Dietary Patterns and Their Associations With Age-Related Macular Degeneration
Source: PubMed Central journal article supplement — Invest Ophthalmol Vis Sci. 2017 Mar;58(3):1404–10. doi: 10.1167/iovs.16-20454 (PMC5361454; doi:10.1167/iovs.16-20454), 2017-03
Supplement: iovs-58-02-53_s01.pdf [file iovs-58-02-53_s01.pdf]

**Supplementary Table 1.** The 90 food items in the food frequency questionnaire administered in the Age-Related Eye Disease Study were first grouped into 37 food groups, which were then entered into our principle component analysis for deriving dietary patterns.<sup>1</sup>

| <b>Food group</b>           | <b>Food items in the AREDS FFQ</b>                                               |
|-----------------------------|----------------------------------------------------------------------------------|
| 1. Processed meats          | Hotdogs, ham, bacon, sausage                                                     |
| 2. Red meats                | Hamburgers, beef, beef stew, pork or lamb                                        |
| 3. Organ meats              | Liver, liverwurst                                                                |
| 4. Fish and other seafood   | Fried fish, tuna, oysters, shrimp, other fish                                    |
| 5. Poultry                  | Fried chicken, chicken or turkey                                                 |
| 6. Pizza                    | Pizza                                                                            |
| 7. Soup                     | Vegetable and tomato soup, other soup                                            |
| 8. Eggs                     | Eggs                                                                             |
| 9. Butter or margarine      | Butter added to vegetable, butter on bread, margarine on bread                   |
| 10. Peanuts                 | Peanuts or peanut butter                                                         |
| 11. Gravies                 | Gravies                                                                          |
| 12. Cold breakfast cereal   | Milk on cereal, other cold breakfast cereal                                      |
| 13. Whole grains            | High fiber cereals, fortified cereals, cooked cereals, dark bread                |
| 14. Refined grains          | Biscuits, white bread, corn bread, spaghetti, other noodle                       |
| 15. Rice                    | Rice                                                                             |
| 16. Snacks                  | Chips                                                                            |
| 17. High energy drinks      | Regular soft drink, Fruit Drinks, Sugar in coffee or tea                         |
| 18. Sweets and desserts     | doughnuts, chocolate candy, other candy                                          |
| 19. French fries            | French fries                                                                     |
| 20. Liquor                  | Liquor                                                                           |
| 21. Beer                    | Beer                                                                             |
| 22. Wine                    | Wine                                                                             |
| 23. High-fat dairy products | Whole milk, ice cream, other cheeses, macaroni and cheese, milk in coffee or tea |
| 24. Low-fat dairy products  | 2% milk, 1% milk, yogurt, Cottage cheese                                         |
| 25. Condiments              | Red chili sauce                                                                  |
| 26. Salad dressings         | Salad dressings                                                                  |

|                                        |                                                                                                  |
|----------------------------------------|--------------------------------------------------------------------------------------------------|
| 27. Fruit                              | Apples, bananas, peaches, cantaloupe, watermelon, strawberries, oranges, grapefruit, other fruit |
| 28. Fruit juices                       | Orange or grapefruit juice                                                                       |
| 29. Cruciferous vegetables             | Broccoli, Cole slaw, cauliflower, cooked greens                                                  |
| 30. Dark-yellow vegetables             | Winter squash, carrots, sweet potatoes                                                           |
| 31. Tomatoes                           | Tomatoes                                                                                         |
| 32. Green leafy vegetables             | Raw spinach, cooked spinach, green salad                                                         |
| 33. Legumes                            | String beans, peas, other beans, chili with beans                                                |
| 34. Other vegetables                   | Corn, any other vegetable                                                                        |
| 35. Potatoes                           | Other potatoes                                                                                   |
| 36. Coffee or Tea                      | Coffee or tea                                                                                    |
| 37. Non-dairy creamer in coffee or tea | Non-dairy creamer in coffee or tea                                                               |

Abbreviation: **AREDS**, Age-Related Eye Disease Study; **FFQ**, food frequency questionnaire.

<sup>1</sup> Table is adapted from *Am J Ophthalmol.* 2014 Jul;158(1):118-127.

**Supplementary Table 2.** Age-standardized characteristics and dietary consumptions by Factor 3 (Steak pattern) score quintiles in the AREDS.

|                                       | 'Q1' (n=817)         | 'Q2' (n=818)         | 'Q3' (n=818)         | 'Q4' (n=818)         | 'Q5' (n=817)         | <i>P</i> value <sup>2</sup> |
|---------------------------------------|----------------------|----------------------|----------------------|----------------------|----------------------|-----------------------------|
| Age <sup>1</sup>                      | 68.26 (5.11)         | 68.30 (5.14)         | 68.85 (5.01)         | 68.67 (5.11)         | 68.74 (5.04)         | 0.032                       |
| Male gender                           | 0.38                 | 0.35                 | 0.39                 | 0.44                 | 0.55                 | <0.0001 <sup>3</sup>        |
| College or higher                     | 0.67                 | 0.68                 | 0.66                 | 0.63                 | 0.62                 | 0.052 <sup>3</sup>          |
| White                                 | 0.91                 | 0.96                 | 0.98                 | 0.98                 | 0.98                 | <0.0001 <sup>3</sup>        |
| BMI (Kg/m <sup>2</sup> )              | 27.02 (4.67)         | 26.75 (4.51)         | 27.35 (4.71)         | 27.63 (4.85)         | 27.72 (4.94)         | <0.0001                     |
| Sunlight exposure (h/d)               | 1.02 (1.17)          | 1.02 (1.12)          | 0.96 (1.00)          | 1.03 (1.10)          | 1.16 (1.16)          | 0.004                       |
| Ever smoke                            | 0.51 (0.50)          | 0.54 (0.50)          | 0.51 (0.50)          | 0.55 (0.50)          | 0.62 (0.48)          | <0.0001 <sup>3</sup>        |
| Alcohol intake (g/d)                  | 6.21 (12.52)         | 5.16 (9.26)          | 6.40 (13.26)         | 6.20 (11.42)         | 7.88 (12.92)         | 0.0008                      |
| Hypertension history                  | 0.39 (0.49)          | 0.36 (0.48)          | 0.37 (0.48)          | 0.38 (0.49)          | 0.38 (0.49)          | 0.75 <sup>3</sup>           |
| Daily energy-adjusted nutrient intake |                      |                      |                      |                      |                      |                             |
| Vitamin C (mg)                        | 128.93 (59.00)       | 109.70 (49.75)       | 102.66 (44.42)       | 97.96 (47.22)        | 84.60 (49.89)        | <0.0001                     |
| Vitamin E (µg)                        | 9.58 (4.38)          | 9.73 (4.84)          | 9.45 (4.23)          | 9.66 (4.77)          | 10.02 (5.55)         | 0.038                       |
| Beta-carotene (mg)                    | 2701.84<br>(1880.54) | 2586.29<br>(1645.92) | 2533.62<br>(1428.60) | 2548.91<br>(1699.54) | 2515.46<br>(1851.42) | 0.014                       |
| Zinc (mg)                             | 9.64 (4.45)          | 9.74 (4.13)          | 9.48 (3.88)          | 9.70 (4.24)          | 10.04 (5.11)         | 0.21                        |
| Lutein plus zeaxanthin<br>(µg)        | 1901.83<br>(1298.09) | 1725.60<br>(1073.52) | 1601.30<br>(942.89)  | 1583.37<br>(969.89)  | 1507.20<br>(1054.29) | <0.0001                     |
| DHA (mg)                              | 0.06 (0.04)          | 0.05 (0.03)          | 0.05 (0.03)          | 0.05 (0.03)          | 0.04 (0.04)          | <0.0001                     |

|                                                      | 'Q1' (n=817)        | 'Q2' (n=818)        | 'Q3' (n=818)        | 'Q4' (n=818)        | 'Q5' (n=817)        | <i>P</i> value <sup>2</sup> |
|------------------------------------------------------|---------------------|---------------------|---------------------|---------------------|---------------------|-----------------------------|
| EPA (mg)                                             | 0.04 (0.04)         | 0.03 (0.03)         | 0.03 (0.03)         | 0.03 (0.03)         | 0.03 (0.03)         | <0.0001                     |
| Calorie intake (Kcal/d)                              | 1267.69<br>(502.85) | 1257.15<br>(479.23) | 1438.78<br>(517.70) | 1607.88<br>(520.97) | 1911.92<br>(541.96) | <0.0001                     |
| Daily intake of food or food group (med. servings/d) |                     |                     |                     |                     |                     |                             |
| Potatoes                                             | 0.15 (0.15)         | 0.21 (0.16)         | 0.31 (0.19)         | 0.46 (0.24)         | 0.70 (0.33)         | <0.0001                     |
| Butter or margarine                                  | 0.40 (0.45)         | 0.54 (0.52)         | 0.79 (0.68)         | 1.12 (0.81)         | 1.74 (1.16)         | <0.0001                     |
| Red meat                                             | 0.17 (0.17)         | 0.22 (0.18)         | 0.31 (0.22)         | 0.39 (0.25)         | 0.59 (0.36)         | <0.0001                     |
| Gravies                                              | 0.02 (0.04)         | 0.03 (0.05)         | 0.05 (0.08)         | 0.07 (0.10)         | 0.17 (0.20)         | <0.0001                     |

Abbreviation: **AREDS**, Age-Related Eye Disease Study; **DHA**, docosahexaenoic acid; **EPA**, eicosapentaenoic acid.

Values are means (standard deviation) or proportions and are standardized to the age distribution of the study population.

<sup>1</sup> Value is not age adjusted.

<sup>2</sup> *P* values are for test of linear trend across prudent pattern score, otherwise indicated.

<sup>3</sup> Chi-square tests compare the characteristic distributions among prudent pattern score quintile groups.

**Supplementary Table 3.** Age-standardized characteristics and dietary consumptions by Factor 4 (Breakfast pattern) score quintiles in the AREDS.

|                                       | 'Q1' (n=817)         | 'Q2' (n=818)         | 'Q3' (n=818)         | 'Q4' (n=818)         | 'Q5' (n=817)         | <i>P</i> value <sup>2</sup> |
|---------------------------------------|----------------------|----------------------|----------------------|----------------------|----------------------|-----------------------------|
| Age <sup>1</sup>                      | 67.54 (5.01)         | 68.56 (5.17)         | 68.86 (5.29)         | 68.89 (4.93)         | 68.96 (4.89)         | <0.0001                     |
| Male gender                           | 0.33                 | 0.37                 | 0.41                 | 0.46                 | 0.53                 | <0.0001 <sup>3</sup>        |
| College or higher                     | 0.59                 | 0.62                 | 0.68                 | 0.65                 | 0.71                 | <0.0001 <sup>3</sup>        |
| White                                 | 0.95                 | 0.96                 | 0.97                 | 0.96                 | 0.97                 | 0.021 <sup>3</sup>          |
| BMI (Kg/m <sup>2</sup> )              | 27.49 (5.11)         | 27.41 (4.78)         | 27.07 (4.47)         | 27.23 (4.49)         | 27.15 (4.69)         | 0.22                        |
| Sunlight exposure (h/d)               | 1.06 (1.12)          | 0.98 (1.09)          | 1.05 (1.11)          | 1.07 (1.11)          | 1.01 (1.11)          | 0.95                        |
| Ever smoke                            | 0.61                 | 0.55                 | 0.53                 | 0.53                 | 0.51                 | 0.0002 <sup>3</sup>         |
| Alcohol intake (g/d)                  | 6.23 (12.74)         | 5.76 (10.94)         | 6.89 (10.77)         | 6.49 (12.93)         | 6.30 (11.87)         | 0.62                        |
| Hypertension history                  | 0.38                 | 0.35                 | 0.36                 | 0.38                 | 0.38                 | 0.57 <sup>3</sup>           |
| Daily energy-adjusted nutrient intake |                      |                      |                      |                      |                      |                             |
| Vitamin C (mg)                        | 73.10 (40.64)        | 87.82 (39.61)        | 102.47 (41.73)       | 115.00 (44.17)       | 147.21 (61.44)       | <0.0001                     |
| Vitamin E (μg)                        | 8.71 (2.69)          | 9.34 (3.85)          | 9.78 (4.87)          | 10.02 (5.11)         | 10.58 (6.26)         | <0.0001                     |
| Beta-carotene (mg)                    | 2594.31<br>(1769.26) | 2442.37<br>(1556.01) | 2546.34<br>(1580.70) | 2557.08<br>(1619.70) | 2782.40<br>(1946.24) | 0.002                       |
| Zinc (mg)                             | 8.07 (3.64)          | 8.88 (3.92)          | 9.70 (4.19)          | 10.39 (4.13)         | 11.61 (5.14)         | <.0001                      |
| Lutein plus zeaxanthin<br>(μg)        | 1702.54<br>(1266.58) | 1520.32<br>(931.76)  | 1677.21<br>(1105.09) | 1664.93<br>(1065.08) | 1756.34<br>(1017.26) | 0.044                       |
| DHA (mg)                              | 0.05 (0.04)          | 0.05 (0.03)          | 0.05 (0.03)          | 0.05 (0.04)          | 0.05 (0.04)          | 0.24                        |

|                                                            | 'Q1' (n=817)        | 'Q2' (n=818)        | 'Q3' (n=818)        | 'Q4' (n=818)        | 'Q5' (n=817)        | <i>P</i> value <sup>2</sup> |
|------------------------------------------------------------|---------------------|---------------------|---------------------|---------------------|---------------------|-----------------------------|
| EPA (mg)                                                   | 0.03 (0.03)         | 0.03 (0.03)         | 0.03 (0.03)         | 0.03 (0.03)         | 0.03 (0.03)         | 0.007                       |
| Calorie intake (Kcal/d)                                    | 1326.27<br>(564.73) | 1359.77<br>(535.83) | 1436.16<br>(529.67) | 1582.38<br>(527.63) | 1777.10<br>(546.68) | <0.0001                     |
| Daily intake of food or<br>food group (med.<br>servings/d) |                     |                     |                     |                     |                     |                             |
| Cold breakfast cereal                                      | 0.17 (0.22)         | 0.42 (0.35)         | 0.68 (0.45)         | 0.90 (0.48)         | 1.29 (0.65)         | <0.0001                     |
| Fruit juices                                               | 0.15 (0.23)         | 0.31 (0.32)         | 0.45 (0.39)         | 0.59 (0.42)         | 0.94 (0.63)         | <0.0001                     |
| Whole grains                                               | 0.44 (0.41)         | 0.70 (0.53)         | 0.94 (0.61)         | 1.22 (0.71)         | 1.64 (0.94)         | <0.0001                     |
| Fruit                                                      | 1.14 (0.94)         | 1.46 (1.02)         | 1.57 (1.00)         | 1.91 (1.18)         | 2.42 (1.84)         | <0.0001                     |

Abbreviation: **AREDS**, Age-Related Eye Disease Study; **DHA**, docosahexaenoic acid; **EPA**, eicosapentaenoic acid.

Values are means (standard deviation) or proportions and are standardized to the age distribution of the study population.

<sup>1</sup> Value is not age adjusted.

<sup>2</sup> *P* values are for test of linear trend across prudent pattern score, otherwise indicated.

<sup>3</sup> Chi-square tests compare the characteristic distributions among prudent pattern score quintile groups.

**Supplementary Table 4.** Age-standardized characteristics and dietary consumptions by Factor 5 (Salad pattern) score quintiles in the AREDS.

|                                       | 'Q1' (n=817)         | 'Q2' (n=818)         | 'Q3' (n=818)         | 'Q4' (n=818)         | 'Q5' (n=817)         | <i>P</i> value <sup>2</sup> |
|---------------------------------------|----------------------|----------------------|----------------------|----------------------|----------------------|-----------------------------|
| Age <sup>1</sup>                      | 68.65 (5.05)         | 68.45 (5.22)         | 68.79 (5.14)         | 68.40 (5.01)         | 68.51 (5.00)         | 0.46                        |
| Male gender                           | 0.54                 | 0.43                 | 0.39                 | 0.38                 | 0.38                 | <0.0001 <sup>3</sup>        |
| College or higher                     | 0.60                 | 0.58                 | 0.66                 | 0.70                 | 0.74                 | <0.0001 <sup>3</sup>        |
| White                                 | 0.92                 | 0.96                 | 0.97                 | 0.97                 | 0.99                 | <0.0001 <sup>3</sup>        |
| BMI (Kg/m <sup>2</sup> )              | 27.18 (4.78)         | 27.53 (5.17)         | 27.29 (4.40)         | 27.10 (4.56)         | 27.33 (4.82)         | 0.73                        |
| Sunlight exposure (h/d)               | 1.06 (1.10)          | 0.99 (1.07)          | 1.01 (1.14)          | 1.10 (1.20)          | 1.05 (1.06)          | 0.99                        |
| Ever smoke                            | 0.53                 | 0.54                 | 0.54                 | 0.54                 | 0.58                 | 0.31 <sup>3</sup>           |
| Alcohol intake (g/d)                  | 6.07 (11.51)         | 4.33 (8.80)          | 4.97 (8.59)          | 5.89 (9.69)          | 10.64 (17.63)        | <0.0001                     |
| Hypertension history                  | 0.40                 | 0.39                 | 0.39                 | 0.34                 | 0.35                 | 0.01 <sup>3</sup>           |
| Daily energy-adjusted nutrient intake |                      |                      |                      |                      |                      |                             |
| Vitamin C (mg)                        | 91.74 (50.64)        | 98.73 (48.99)        | 103.63 (49.90)       | 111.76 (51.27)       | 117.97 (56.35)       | <0.0001                     |
| Vitamin E (μg)                        | 9.56 (5.39)          | 9.48 (4.54)          | 9.32 (3.75)          | 9.93 (4.82)          | 10.13 (4.93)         | 0.002                       |
| Beta-carotene (mg)                    | 2587.66<br>(1931.53) | 2440.35<br>(1571.60) | 2490.44<br>(1508.08) | 2634.96<br>(1714.54) | 2764.28<br>(1757.72) | 0.003                       |
| Zinc (mg)                             | 10.94 (5.15)         | 9.97 (3.91)          | 9.40 (3.79)          | 9.34 (4.15)          | 9.05 (4.58)          | <0.0001                     |
| Lutein plus zeaxanthin<br>(μg)        | 1576.72<br>(1140.77) | 1542.16<br>(978.80)  | 1594.78<br>(895.96)  | 1735.26<br>(1168.19) | 1884.35<br>(1178.41) | <0.0001                     |
| DHA (mg)                              | 0.05 (0.04)          | 0.05 (0.03)          | 0.05 (0.03)          | 0.05 (0.04)          | 0.05 (0.04)          | 0.0003                      |

|                                                            | 'Q1' (n=817)        | 'Q2' (n=818)        | 'Q3' (n=818)        | 'Q4' (n=818)        | 'Q5' (n=817)        | <i>P</i> value <sup>2</sup> |
|------------------------------------------------------------|---------------------|---------------------|---------------------|---------------------|---------------------|-----------------------------|
| EPA (mg)                                                   | 0.03 (0.03)         | 0.03 (0.03)         | 0.03 (0.03)         | 0.03 (0.03)         | 0.04 (0.03)         | <0.0001                     |
| Calorie intake (Kcal/d)                                    | 1464.55<br>(617.92) | 1383.48<br>(536.27) | 1400.38<br>(522.26) | 1531.99<br>(547.47) | 1684.31<br>(549.14) | <0.0001                     |
| Daily intake of food or<br>food group (med.<br>servings/d) |                     |                     |                     |                     |                     |                             |
| Salad dressings                                            | 0.10 (0.13)         | 0.15 (0.16)         | 0.24 (0.19)         | 0.34 (0.26)         | 0.64 (0.38)         | <0.0001                     |
| Green leafy vegetables                                     | 0.26 (0.26)         | 0.36 (0.29)         | 0.50 (0.33)         | 0.65 (0.38)         | 0.97 (0.46)         | <0.0001                     |
| Tomatoes                                                   | 0.14 (0.18)         | 0.16 (0.16)         | 0.21 (0.19)         | 0.31 (0.25)         | 0.54 (0.43)         | <0.0001                     |

Abbreviation: **AREDS**, Age-Related Eye Disease Study; **DHA**, docosahexaenoic acid; **EPA**, eicosapentaenoic acid.

Values are means (standard deviation) or proportions and are standardized to the age distribution of the study population.

<sup>1</sup> Value is not age adjusted.

<sup>2</sup> *P* values are for test of linear trend across prudent pattern score, otherwise indicated.

<sup>3</sup> Chi-square tests compare the characteristic distributions among prudent pattern score quintile groups.



**Supplementary Table 5.** Age-standardized characteristics and dietary consumptions by Factor 6 (Caribbean pattern) score quintiles in the AREDS.

|                                       | 'Q1' (n=817)         | 'Q2' (n=818)         | 'Q3' (n=818)         | 'Q4' (n=818)         | 'Q5' (n=817)         | <i>P</i> value <sup>2</sup> |
|---------------------------------------|----------------------|----------------------|----------------------|----------------------|----------------------|-----------------------------|
| Age <sup>1</sup>                      | 69.14 (5.17)         | 68.86 (5.07)         | 68.46 (5.00)         | 68.29 (5.06)         | 68.06 (5.07)         | <0.0001                     |
| Male gender                           | 0.47                 | 0.41                 | 0.40                 | 0.42                 | 0.42                 | 0.043 <sup>3</sup>          |
| College or higher                     | 0.52                 | 0.63                 | 0.65                 | 0.74                 | 0.73                 | <0.0001 <sup>3</sup>        |
| White                                 | 0.97                 | 0.97                 | 0.97                 | 0.96                 | 0.94                 | 0.0003 <sup>3</sup>         |
| BMI (Kg/m <sup>2</sup> )              | 26.97 (4.59)         | 27.35 (4.78)         | 27.10 (4.52)         | 27.10 (4.62)         | 27.96 (5.22)         | 0.0009                      |
| Sunlight exposure (h/d)               | 1.12 (1.16)          | 0.96 (1.12)          | 1.10 (1.13)          | 1.01 (1.02)          | 1.00 (1.07)          | 0.039                       |
| Ever smoke                            | 0.58                 | 0.53                 | 0.53                 | 0.54                 | 0.55                 | 0.34 <sup>3</sup>           |
| Alcohol intake (g/d)                  | 6.09 (11.97)         | 5.07 (9.31)          | 6.55 (12.01)         | 7.65 (14.11)         | 6.58 (11.67)         | 0.019                       |
| Hypertension history                  | 0.38                 | 0.37                 | 0.37                 | 0.38                 | 0.37                 | 0.87 <sup>3</sup>           |
| Daily energy-adjusted nutrient intake |                      |                      |                      |                      |                      |                             |
| Vitamin C (mg)                        | 113.52 (61.10)       | 104.20 (50.22)       | 101.44 (48.36)       | 104.40 (46.90)       | 101.42 (53.38)       | <0.0001                     |
| Vitamin E (µg)                        | 9.62 (4.57)          | 9.43 (4.54)          | 9.65 (4.18)          | 9.90 (5.12)          | 9.72 (5.06)          | 0.35                        |
| Beta-carotene (mg)                    | 2348.36<br>(1697.37) | 2355.08<br>(1394.97) | 2545.50<br>(1784.83) | 2659.97<br>(1470.87) | 3008.30<br>(2034.03) | <0.0001                     |
| Zinc (mg)                             | 8.91 (4.13)          | 9.28 (4.06)          | 9.62 (3.99)          | 10.21 (4.74)         | 10.62 (4.77)         | <0.0001                     |
| Lutein plus zeaxanthin<br>(µg)        | 1501.76<br>(976.65)  | 1521.90<br>(855.93)  | 1649.71<br>(1119.47) | 1729.65<br>(1000.47) | 1915.50<br>(1304.95) | <0.0001                     |
| DHA (mg)                              | 0.03 (0.02)          | 0.04 (0.02)          | 0.04 (0.03)          | 0.06 (0.03)          | 0.08 (0.05)          | <0.0001                     |

|                                                            | 'Q1' (n=817)        | 'Q2' (n=818)        | 'Q3' (n=818)        | 'Q4' (n=818)        | 'Q5' (n=817)        | <i>P</i> value <sup>2</sup> |
|------------------------------------------------------------|---------------------|---------------------|---------------------|---------------------|---------------------|-----------------------------|
| EPA (mg)                                                   | 0.01 (0.02)         | 0.02 (0.02)         | 0.03 (0.02)         | 0.04 (0.03)         | 0.05 (0.04)         | <0.0001                     |
| Calorie intake (Kcal/d)                                    | 1437.03<br>(589.67) | 1326.74<br>(516.56) | 1436.35<br>(543.22) | 1538.11<br>(526.51) | 1736.24<br>(560.46) | <0.0001                     |
| Daily intake of food or<br>food group (med.<br>servings/d) |                     |                     |                     |                     |                     |                             |
| Poultry                                                    | 0.13 (0.12)         | 0.18 (0.14)         | 0.24 (0.15)         | 0.33 (0.18)         | 0.52 (0.27)         | <0.0001                     |
| Fish and other seafood                                     | 0.12 (0.11)         | 0.18 (0.13)         | 0.25 (0.15)         | 0.31 (0.18)         | 0.50 (0.35)         | <0.0001                     |
| Organ meats                                                | 0.01 (0.02)         | 0.01 (0.02)         | 0.01 (0.02)         | 0.01 (0.03)         | 0.04 (0.09)         | <0.0001                     |
| Rice                                                       | 0.09 (0.13)         | 0.11 (0.12)         | 0.13 (0.14)         | 0.18 (0.17)         | 0.25 (0.24)         | <0.0001                     |
| Low-fat dairy products                                     | 0.28 (0.34)         | 0.38 (0.37)         | 0.47 (0.46)         | 0.59 (0.51)         | 0.76 (0.68)         | <0.0001                     |

Abbreviation: **AREDS**, Age-Related Eye Disease Study; **DHA**, docosahexaenoic acid; **EPA**, eicosapentaenoic acid.

Values are means (standard deviation) or proportions and are standardized to the age distribution of the study population.

<sup>1</sup> Value is not age adjusted.

<sup>2</sup> *P* values are for test of linear trend across prudent pattern score, otherwise indicated.

<sup>3</sup> Chi-square tests compare the characteristic distributions among prudent pattern score quintile groups.



|                                                            | 'Q1' (n=817)        | 'Q2' (n=818)        | 'Q3' (n=818)        | 'Q4' (n=818)        | 'Q5' (n=817)        | <i>P</i> value <sup>2</sup> |
|------------------------------------------------------------|---------------------|---------------------|---------------------|---------------------|---------------------|-----------------------------|
| EPA (mg)                                                   | 0.03 (0.03)         | 0.03 (0.03)         | 0.03 (0.03)         | 0.03 (0.03)         | 0.03 (0.03)         | 0.98                        |
| Calorie intake (Kcal/d)                                    | 1411.77<br>(544.51) | 1271.61<br>(509.21) | 1362.73<br>(488.83) | 1550.06<br>(520.93) | 1887.88<br>(545.00) | <.0001                      |
| Daily intake of food or<br>food group (med.<br>servings/d) |                     |                     |                     |                     |                     |                             |
| Pizza                                                      | 0.01 (0.02)         | 0.02 (0.02)         | 0.03 (0.03)         | 0.05 (0.04)         | 0.10 (0.09)         | <0.0001                     |
| Refined grains                                             | 0.41 (0.36)         | 0.53 (0.39)         | 0.71 (0.47)         | 0.97 (0.64)         | 1.42 (0.89)         | <0.0001                     |
| French fries                                               | 0.02 (0.04)         | 0.02 (0.04)         | 0.04 (0.05)         | 0.06 (0.08)         | 0.12 (0.17)         | <0.0001                     |

Abbreviation: **AREDS**, Age-Related Eye Disease Study; **DHA**, docosahexaenoic acid; **EPA**, eicosapentaenoic acid.

Values are means (standard deviation) or proportions and are standardized to the age distribution of the study population.

<sup>1</sup> Value is not age adjusted.

<sup>2</sup> *P* values are for test of linear trend across prudent pattern score, otherwise indicated.

<sup>3</sup> Chi-square tests compare the characteristic distributions among prudent pattern score quintile groups.

**Supplementary Table 7.** Age-standardized characteristics and dietary consumptions by Factor 8 (Peanut pattern) score quintiles in the AREDS.

|                                       | 'Q1' (n=817)         | 'Q2' (n=818)         | 'Q3' (n=818)         | 'Q4' (n=818)         | 'Q5' (n=817)         | <i>P</i> value <sup>2</sup> |
|---------------------------------------|----------------------|----------------------|----------------------|----------------------|----------------------|-----------------------------|
| Age <sup>1</sup>                      | 68.39 (5.00)         | 68.89 (4.99)         | 68.80 (5.20)         | 68.50 (5.13)         | 68.25 (5.08)         | 0.1915                      |
| Male gender                           | 0.45                 | 0.39                 | 0.39                 | 0.42                 | 0.47                 | 0.0059 <sup>3</sup>         |
| College or higher                     | 0.62                 | 0.63                 | 0.63                 | 0.69                 | 0.70                 | <0.0001 <sup>3</sup>        |
| White                                 | 0.94                 | 0.96                 | 0.96                 | 0.98                 | 0.97                 | 0.0005 <sup>3</sup>         |
| BMI (Kg/m <sup>2</sup> )              | 28.02 (5.06)         | 27.43 (4.75)         | 27.14 (4.69)         | 27.03 (4.84)         | 26.80 (4.31)         | <0.0001                     |
| Sunlight exposure (h/d)               | 1.01 (1.08)          | 1.04 (1.19)          | 1.00 (1.07)          | 1.01 (1.10)          | 1.11 (1.08)          | 0.1199                      |
| Ever smoke                            | 0.59                 | 0.52                 | 0.54                 | 0.55                 | 0.53                 | 0.0379 <sup>3</sup>         |
| Alcohol intake (g/d)                  | 6.45 (12.56)         | 5.59 (12.17)         | 5.58 (9.70)          | 6.66 (12.21)         | 7.29 (12.52)         | 0.0467                      |
| Hypertension history                  | 0.43                 | 0.43                 | 0.36                 | 0.36                 | 0.30                 | <0.0001 <sup>3</sup>        |
| Daily energy-adjusted nutrient intake |                      |                      |                      |                      |                      |                             |
| Vitamin C (mg)                        | 118.00 (54.61)       | 107.92 (48.91)       | 100.49 (49.50)       | 101.23 (50.93)       | 95.37 (54.72)        | <0.0001                     |
| Vitamin E (µg)                        | 9.35 (4.23)          | 9.40 (4.35)          | 9.41 (4.53)          | 9.72 (5.09)          | 10.60 (5.47)         | <0.0001                     |
| Beta-carotene (mg)                    | 2995.96<br>(1802.63) | 2632.21<br>(1415.15) | 2469.49<br>(1511.80) | 2459.73<br>(1754.53) | 2300.88<br>(1807.04) | <0.0001                     |
| Zinc (mg)                             | 10.45 (4.86)         | 9.89 (3.85)          | 9.74 (4.16)          | 9.41 (4.42)          | 9.21 (4.50)          | <0.0001                     |
| Lutein plus zeaxanthin<br>(µg)        | 1968.00<br>(1252.47) | 1716.78<br>(972.50)  | 1563.53<br>(839.99)  | 1601.21<br>(1153.63) | 1474.62<br>(1109.00) | <0.0001                     |
| DHA (mg)                              | 0.07 (0.04)          | 0.05 (0.03)          | 0.04 (0.03)          | 0.05 (0.03)          | 0.04 (0.04)          | <0.0001                     |

|                                                            | 'Q1' (n=817)        | 'Q2' (n=818)        | 'Q3' (n=818)        | 'Q4' (n=818)        | 'Q5' (n=817)        | <i>P</i> value <sup>2</sup> |
|------------------------------------------------------------|---------------------|---------------------|---------------------|---------------------|---------------------|-----------------------------|
| EPA (mg)                                                   | 0.04 (0.04)         | 0.03 (0.03)         | 0.03 (0.03)         | 0.03 (0.03)         | 0.03 (0.03)         | <0.0001                     |
| Calorie intake (Kcal/d)                                    | 1285.66<br>(490.76) | 1249.48<br>(485.27) | 1384.65<br>(478.12) | 1604.54<br>(507.44) | 1950.75<br>(539.89) | <0.0001                     |
| Daily intake of food or<br>food group (med.<br>servings/d) |                     |                     |                     |                     |                     |                             |
| Peanuts                                                    | 0.03 (0.06)         | 0.05 (0.07)         | 0.09 (0.11)         | 0.16 (0.18)         | 0.47 (0.48)         | <0.0001                     |
| Sweets and desserts                                        | 0.26 (0.31)         | 0.38 (0.37)         | 0.59 (0.48)         | 0.87 (0.65)         | 1.41 (1.07)         | <0.0001                     |
| Snacks                                                     | 0.05 (0.09)         | 0.08 (0.11)         | 0.13 (0.16)         | 0.23 (0.25)         | 0.42 (0.45)         | <0.0001                     |
| High-fat dairy products                                    | 0.32 (0.36)         | 0.44 (0.42)         | 0.56 (0.51)         | 0.75 (0.59)         | 0.99 (0.77)         | <0.0001                     |

Abbreviation: **AREDS**, Age-Related Eye Disease Study; **DHA**, docosahexaenoic acid; **EPA**, eicosapentaenoic acid.

Values are means (standard deviation) or proportions and are standardized to the age distribution of the study population.

<sup>1</sup> Value is not age adjusted.

<sup>2</sup> *P* values are for test of linear trend across prudent pattern score, otherwise indicated.

<sup>3</sup> Chi-square tests compare the characteristic distributions among prudent pattern score quintile groups.

**Supplementary Table 8.** Age-standardized characteristics and dietary consumptions by Factor 9 (Alcohol pattern) score quintiles in the AREDS.

|                                       | 'Q1' (n=817)         | 'Q2' (n=818)         | 'Q3' (n=818)         | 'Q4' (n=818)         | 'Q5' (n=817)         | <i>P</i> value <sup>2</sup> |
|---------------------------------------|----------------------|----------------------|----------------------|----------------------|----------------------|-----------------------------|
| Age <sup>1</sup>                      | 69.00 (5.24)         | 68.97 (4.94)         | 68.62 (5.11)         | 68.14 (5.07)         | 68.08 (4.99)         | <0.0001                     |
| Male gender                           | 0.33                 | 0.32                 | 0.38                 | 0.47                 | 0.63                 | <0.0001 <sup>3</sup>        |
| College or higher                     | 0.60                 | 0.59                 | 0.63                 | 0.69                 | 0.77                 | <0.0001 <sup>3</sup>        |
| White                                 | 0.96                 | 0.94                 | 0.96                 | 0.96                 | 0.97                 | 0.14 <sup>3</sup>           |
| BMI (Kg/m <sup>2</sup> )              | 27.65 (5.10)         | 27.60 (4.89)         | 27.55 (5.18)         | 26.91 (4.25)         | 26.72 (4.14)         | 0.003                       |
| Sunlight exposure (h/d)               | 0.95 (1.06)          | 1.01 (1.20)          | 1.02 (1.03)          | 1.07 (1.12)          | 1.18 (1.14)          | <0.0001                     |
| Ever smoke                            | 0.49                 | 0.44                 | 0.55                 | 0.58                 | 0.67                 | <0.0001 <sup>3</sup>        |
| Alcohol intake (g/d)                  | 0.61 (1.43)          | 0.87 (1.85)          | 1.80 (3.05)          | 5.61 (4.72)          | 22.96 (17.92)        | <0.0001                     |
| Hypertension history                  | 0.36                 | 0.39                 | 0.39                 | 0.37                 | 0.35                 | 0.12 <sup>3</sup>           |
| Daily energy-adjusted nutrient intake |                      |                      |                      |                      |                      |                             |
| Vitamin C (mg)                        | 103.35 (60.82)       | 103.40 (52.57)       | 102.05 (45.36)       | 110.48 (51.21)       | 103.89 (49.79)       | 0.36                        |
| Vitamin E (μg)                        | 8.44 (4.23)          | 9.16 (4.30)          | 9.98 (4.62)          | 10.28 (4.54)         | 10.50 (5.58)         | <0.0001                     |
| Beta-carotene (mg)                    | 2796.28<br>(2351.03) | 2537.76<br>(1518.98) | 2545.75<br>(1419.56) | 2524.67<br>(1513.46) | 2505.35<br>(1539.81) | 0.0008                      |
| Zinc (mg)                             | 8.65 (3.85)          | 9.47 (4.22)          | 9.90 (4.16)          | 10.17 (4.12)         | 10.47 (5.27)         | <0.0001                     |
| Lutein plus zeaxanthin<br>(μg)        | 1616.38<br>(1304.05) | 1599.75<br>(959.25)  | 1654.85<br>(1003.97) | 1738.37<br>(1089.15) | 1709.65<br>(1009.10) | 0.089                       |
| DHA (mg)                              | 0.04 (0.04)          | 0.05 (0.03)          | 0.05 (0.04)          | 0.05 (0.04)          | 0.06 (0.04)          | <0.0001                     |

|                                                            | 'Q1' (n=817)        | 'Q2' (n=818)        | 'Q3' (n=818)        | 'Q4' (n=818)        | 'Q5' (n=817)        | <i>P</i> value <sup>2</sup> |
|------------------------------------------------------------|---------------------|---------------------|---------------------|---------------------|---------------------|-----------------------------|
| EPA (mg)                                                   | 0.03 (0.03)         | 0.03 (0.03)         | 0.03 (0.03)         | 0.04 (0.03)         | 0.04 (0.03)         | <0.0001                     |
| Calorie intake (Kcal/d)                                    | 1727.87<br>(559.42) | 1364.09<br>(521.71) | 1293.65<br>(522.85) | 1398.42<br>(531.05) | 1699.29<br>(545.19) | <0.0001                     |
| Daily intake of food or<br>food group (med.<br>servings/d) |                     |                     |                     |                     |                     |                             |
| Liquor                                                     | 0.01 (0.02)         | 0.01 (0.03)         | 0.02 (0.04)         | 0.06 (0.10)         | 0.29 (0.34)         | <0.0001                     |
| Beer                                                       | 0.00 (0.01)         | 0.01 (0.03)         | 0.01 (0.03)         | 0.04 (0.06)         | 0.17 (0.26)         | <0.0001                     |
| Wine                                                       | 0.01 (0.02)         | 0.01 (0.03)         | 0.02 (0.05)         | 0.06 (0.09)         | 0.19 (0.27)         | <0.0001                     |

Abbreviation: **AREDS**, Age-Related Eye Disease Study; **DHA**, docosahexaenoic acid; **EPA**, eicosapentaenoic acid.

Values are means (standard deviation) or proportions and are standardized to the age distribution of the study population.

<sup>1</sup> Value is not age adjusted.

<sup>2</sup> *P* values are for test of linear trend across prudent pattern score, otherwise indicated.

<sup>3</sup> Chi-square tests compare the characteristic distributions among prudent pattern score quintile groups.



**Supplementary Table 9.** Age-standardized characteristics and dietary consumptions by Factor 10 (Beverage pattern) score quintiles in the AREDS.

|                                       | 'Q1' (n=817)         | 'Q2' (n=818)         | 'Q3' (n=818)         | 'Q4' (n=818)         | 'Q5' (n=817)         | <i>P</i> value <sup>2</sup> |
|---------------------------------------|----------------------|----------------------|----------------------|----------------------|----------------------|-----------------------------|
| Age <sup>1</sup>                      | 68.92 (4.96)         | 68.97 (4.97)         | 68.40 (5.18)         | 68.60 (5.08)         | 67.92 (5.16)         | <0.0001                     |
| Male gender                           | 0.44                 | 0.37                 | 0.40                 | 0.43                 | 0.48                 | 0.0003 <sup>3</sup>         |
| College or higher                     | 0.64                 | 0.65                 | 0.69                 | 0.69                 | 0.61                 | 0.0091 <sup>3</sup>         |
| White                                 | 0.94                 | 0.98                 | 0.97                 | 0.97                 | 0.95                 | 0.0014 <sup>3</sup>         |
| BMI (Kg/m <sup>2</sup> )              | 27.46 (4.75)         | 27.14 (4.75)         | 27.11 (4.66)         | 27.30 (4.86)         | 27.44 (4.81)         | 0.3304                      |
| Sunlight exposure (h/d)               | 0.98 (1.08)          | 1.09 (1.14)          | 1.03 (1.04)          | 1.00 (1.10)          | 1.09 (1.21)          | 0.1302                      |
| Ever smoke                            | 0.51                 | 0.49                 | 0.56                 | 0.55                 | 0.61                 | <0.0001 <sup>3</sup>        |
| Alcohol intake (g/d)                  | 6.93 (13.75)         | 5.72 (10.60)         | 5.75 (11.38)         | 6.72 (11.62)         | 6.64 (12.18)         | 0.6675                      |
| Hypertension history                  | 0.39                 | 0.39                 | 0.37                 | 0.36                 | 0.38                 | 0.5356 <sup>3</sup>         |
| Daily energy-adjusted nutrient intake |                      |                      |                      |                      |                      |                             |
| Vitamin C (mg)                        | 109.12 (51.29)       | 105.62 (50.33)       | 108.21 (50.24)       | 101.23 (51.52)       | 99.54 (56.24)        | <0.0001                     |
| Vitamin E (µg)                        | 10.19 (4.73)         | 9.76 (4.26)          | 9.79 (4.86)          | 9.37 (4.53)          | 9.37 (5.50)          | <0.0001                     |
| Beta-carotene (mg)                    | 2846.54<br>(2018.93) | 2587.40<br>(1599.35) | 2589.67<br>(1613.62) | 2402.97<br>(1513.37) | 2393.38<br>(1593.85) | <0.0001                     |
| Zinc (mg)                             | 10.05 (4.47)         | 9.66 (4.53)          | 9.73 (4.25)          | 9.58 (4.30)          | 9.67 (4.58)          | 0.0030                      |
| Lutein plus zeaxanthin<br>(µg)        | 1700.90<br>(1124.07) | 1638.59<br>(980.93)  | 1640.17<br>(960.34)  | 1680.49<br>(1137.79) | 1643.82<br>(1185.99) | 0.0820                      |
| DHA (mg)                              | 0.06 (0.04)          | 0.05 (0.03)          | 0.05 (0.03)          | 0.05 (0.03)          | 0.04 (0.03)          | <0.0001                     |

|                                                            | 'Q1' (n=817)        | 'Q2' (n=818)        | 'Q3' (n=818)        | 'Q4' (n=818)        | 'Q5' (n=817)        | <i>P</i> value <sup>2</sup> |
|------------------------------------------------------------|---------------------|---------------------|---------------------|---------------------|---------------------|-----------------------------|
| EPA (mg)                                                   | 0.04 (0.04)         | 0.03 (0.03)         | 0.03 (0.03)         | 0.03 (0.03)         | 0.03 (0.03)         | <0.0001                     |
| Calorie intake (Kcal/d)                                    | 1456.55<br>(580.11) | 1354.60<br>(553.85) | 1454.06<br>(535.10) | 1545.08<br>(545.21) | 1674.47<br>(580.34) | <0.0001                     |
| Daily intake of food or<br>food group (med.<br>servings/d) |                     |                     |                     |                     |                     |                             |
| Non-dairy creamer                                          | 0.01 (0.03)         | 0.01 (0.03)         | 0.01 (0.06)         | 0.05 (0.11)         | 0.36 (0.51)         | <0.0001                     |
| Coffee or tea                                              | 0.29 (0.28)         | 0.55 (0.26)         | 0.73 (0.25)         | 0.83 (0.27)         | 1.26 (0.72)         | <0.0001                     |
| High energy drink                                          | 0.16 (0.24)         | 0.18 (0.25)         | 0.24 (0.35)         | 0.37 (0.42)         | 0.58 (0.65)         | <0.0001                     |

Abbreviation: **AREDS**, Age-Related Eye Disease Study; **DHA**, docosahexaenoic acid; **EPA**, eicosapentaenoic acid.

Values are means (standard deviation) or proportions and are standardized to the age distribution of the study population.

<sup>1</sup> Value is not age adjusted.

<sup>2</sup> *P* values are for test of linear trend across prudent pattern score, otherwise indicated.

<sup>3</sup> Chi-square tests compare the characteristic distributions among prudent pattern score quintile groups.

**Legends:**

**Supplementary Figure 1.** Odds ratios (95% confidence intervals) of age-related macular degeneration according to quintile groups of Steak pattern scores.

Abbreviation: OR, odds ratio; CI, confidence interval; AMD, age-related macular degeneration.

Participants were divided into quintile categories according to their dietary pattern score and those in the lowest 20% of the distribution comprised the referent category. The multivariate-adjusted logistic models using Group 1 (n = 2,739) as control were adjusted for age, sex, race, education, smoking status, alcohol intake, calorie intake, multivitamin use, body mass index, sunlight exposure, hypertension history, lens opacity, and refractive error. The analysis used 4,599 early AMD eyes (1,801 eyes with intermediate drusen plus 2,798 eyes with large drusen, i.e., Group 2 plus Group 3) and 765 advanced AMD eyes (164 eyes with geographic atrophy plus 601 eyes with choroidal neovascularization, i.e., Group 4 plus Group 5). See **AMD grading procedures** in METHODS section for the five (Groups 1~5) AMD grouping criteria.

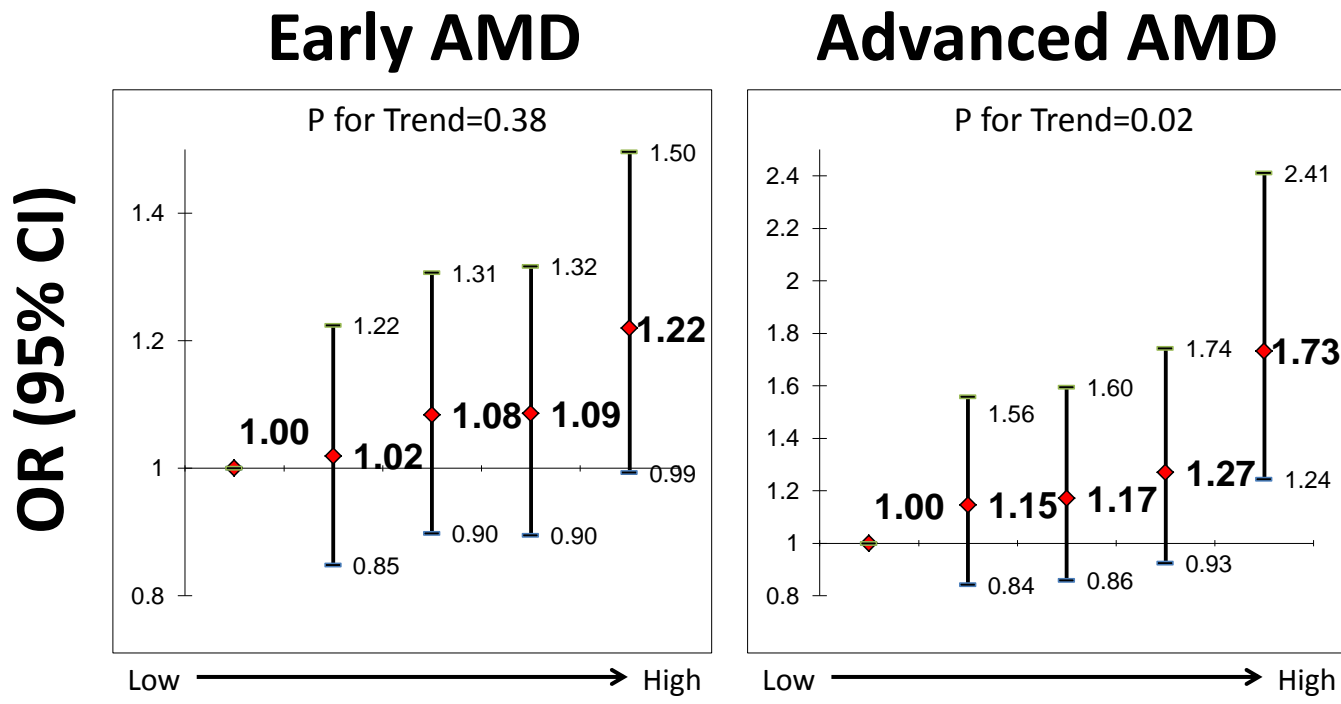

**Factor 3 (Steak Pattern) Score Quintile Groups**

**Legends:**

**Supplementary Figure 2.** Odds ratios (95% confidence intervals) of age-related macular degeneration according to quintile groups of Breakfast pattern scores.

Abbreviation: OR, odds ratio; CI, confidence interval; AMD, age-related macular degeneration.

Participants were divided into quintile categories according to their dietary pattern score and those in the lowest 20% of the distribution comprised the referent category. The multivariate-adjusted logistic models using Group 1 (n = 2,739) as control were adjusted for age, sex, race, education, smoking status, alcohol intake, calorie intake, multivitamin use, body mass index, sunlight exposure, hypertension history, lens opacity, and refractive error. The analysis used 4,599 early AMD eyes (1,801 eyes with intermediate drusen plus 2,798 eyes with large drusen, i.e., Group 2 plus Group 3) and 765 advanced AMD eyes (164 eyes with geographic atrophy plus 601 eyes with choroidal neovascularization, i.e., Group 4 plus Group 5). See **AMD grading procedures** in METHODS section for the five (Groups 1~5) AMD grouping criteria.

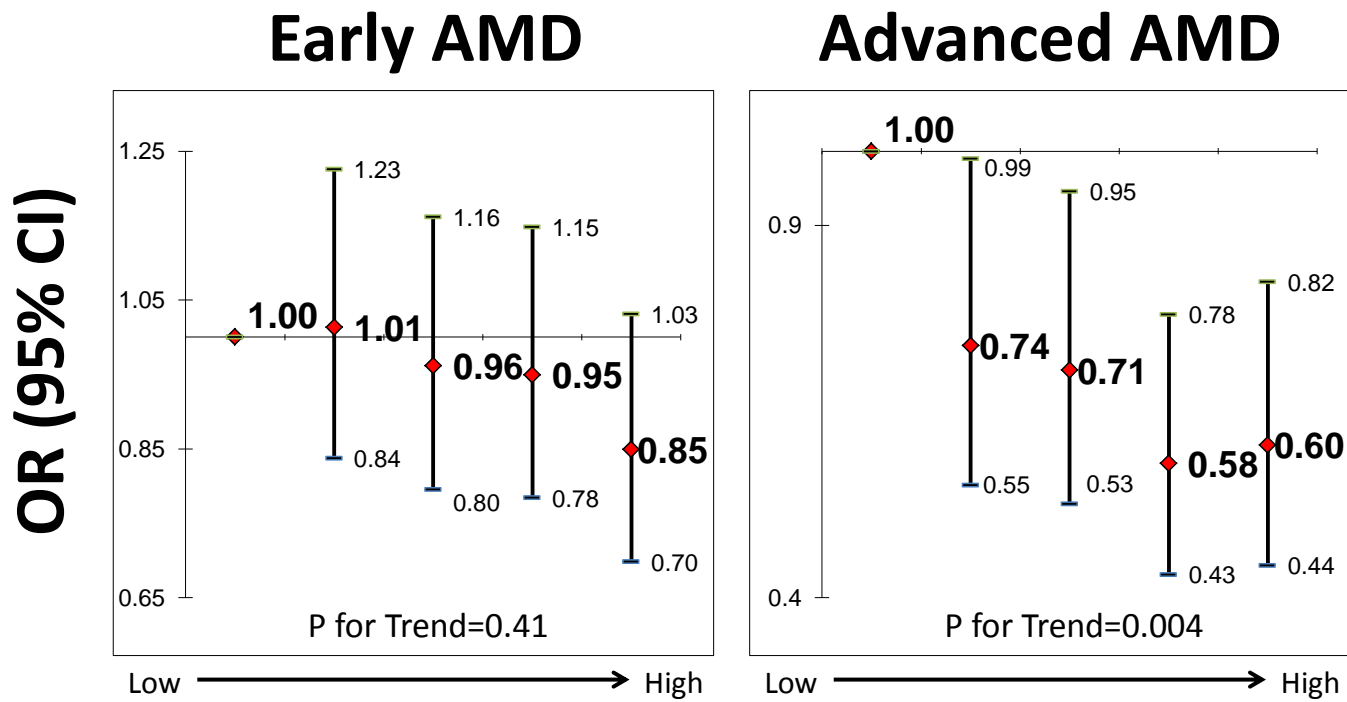

**Factor 4 (Breakfast Pattern) Score Quintile Groups**

**Legends:**

**Supplementary Figure 3.** Odds ratios (95% confidence intervals) of age-related macular degeneration according to quintile groups of Caribbean pattern scores.

Abbreviation: OR, odds ratio; CI, confidence interval; AMD, age-related macular degeneration.

Participants were divided into quintile categories according to their dietary pattern score and those in the lowest 20% of the distribution comprised the referent category. The multivariate-adjusted logistic models using Group 1 (n = 2,739) as control were adjusted for age, sex, race, education, smoking status, alcohol intake, calorie intake, multivitamin use, body mass index, sunlight exposure, hypertension history, lens opacity, and refractive error. The analysis used 4,599 early AMD eyes (1,801 eyes with intermediate drusen plus 2,798 eyes with large drusen, i.e., Group 2 plus Group 3) and 765 advanced AMD eyes (164 eyes with geographic atrophy plus 601 eyes with choroidal neovascularization, i.e., Group 4 plus Group 5). See **AMD grading procedures** in METHODS section for the five (Groups 1~5) AMD grouping criteria.

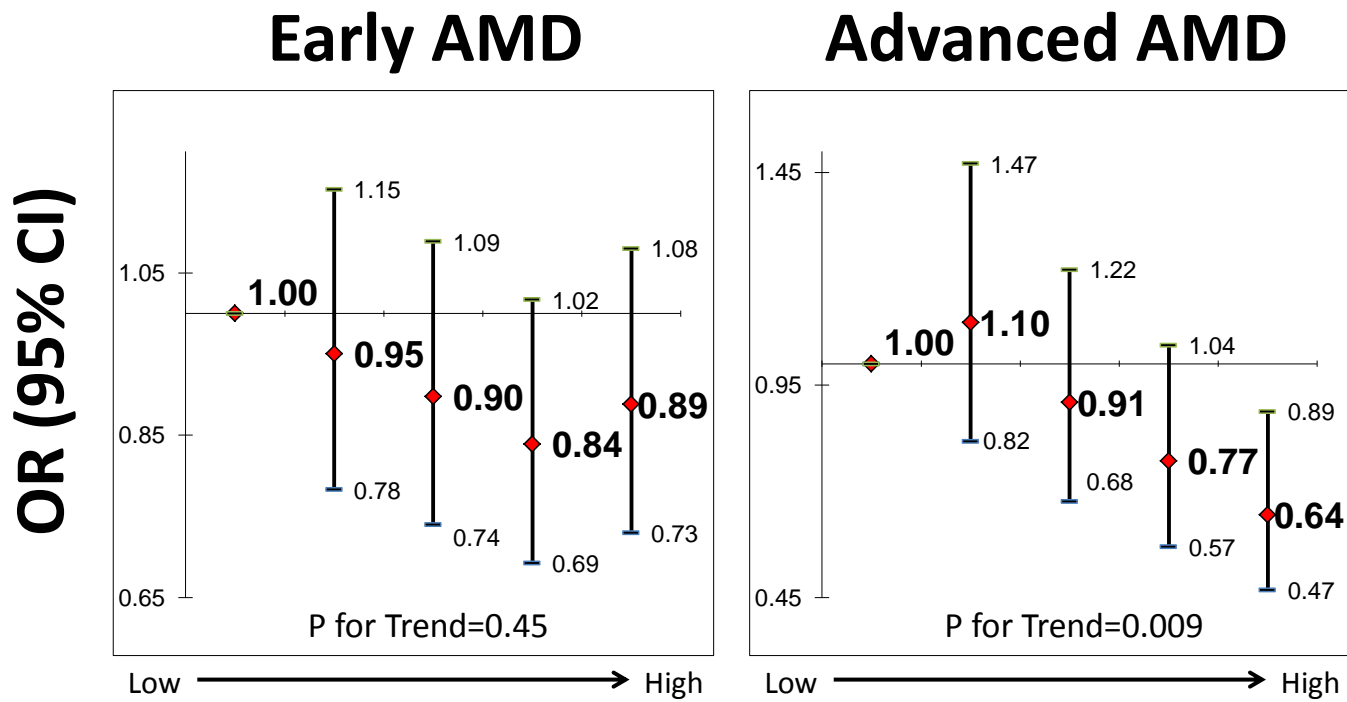

**Factor 6 (Caribbean Pattern) Score Quintile Groups**



**Legends:**

**Supplementary Figure 4.** Odds ratios (95% confidence intervals) of age-related macular degeneration according to quintile groups of Peanut pattern scores.

Abbreviation: OR, odds ratio; CI, confidence interval; AMD, age-related macular degeneration.

Participants were divided into quintile categories according to their dietary pattern score and those in the lowest 20% of the distribution comprised the referent category. The multivariate-adjusted logistic models using Group 1 (n = 2,739) as control were adjusted for age, sex, race, education, smoking status, alcohol intake, calorie intake, multivitamin use, body mass index, sunlight exposure, hypertension history, lens opacity, and refractive error. The analysis used 4,599 early AMD eyes (1,801 eyes with intermediate drusen plus 2,798 eyes with large drusen, i.e., Group 2 plus Group 3) and 765 advanced AMD eyes (164 eyes with geographic atrophy plus 601 eyes with choroidal neovascularization, i.e., Group 4 plus Group 5). See **AMD grading procedures** in METHODS section for the five (Groups 1~5) AMD grouping criteria.

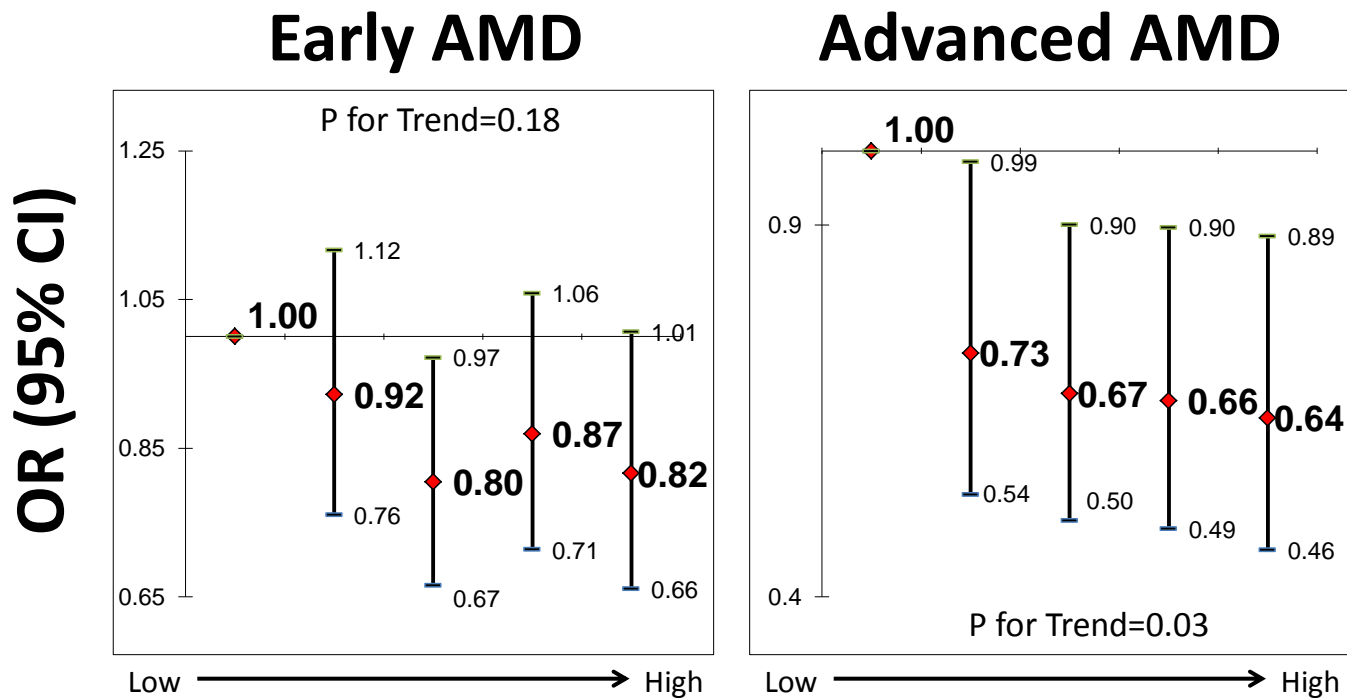

**Factor 8 (Peanut Pattern) Score Quintile Groups**

**Legends:**

**Supplementary Figure 5.** Odds ratios (95% confidence intervals) of age-related macular degeneration according to quintile groups of Salad pattern scores.

Abbreviation: OR, odds ratio; CI, confidence interval; AMD, age-related macular degeneration.

Participants were divided into quintile categories according to their dietary pattern score and those in the lowest 20% of the distribution comprised the referent category. The multivariate-adjusted logistic models using Group 1 (n = 2,739) as control were adjusted for age, sex, race, education, smoking status, alcohol intake, calorie intake, multivitamin use, body mass index, sunlight exposure, hypertension history, lens opacity, and refractive error. The analysis used 4,599 early AMD eyes (1,801 eyes with intermediate drusen plus 2,798 eyes with large drusen, i.e., Group 2 plus Group 3) and 765 advanced AMD eyes (164 eyes with geographic atrophy plus 601 eyes with choroidal neovascularization, i.e., Group 4 plus Group 5). See **AMD grading procedures** in METHODS section for the five (Groups 1~5) AMD grouping criteria.

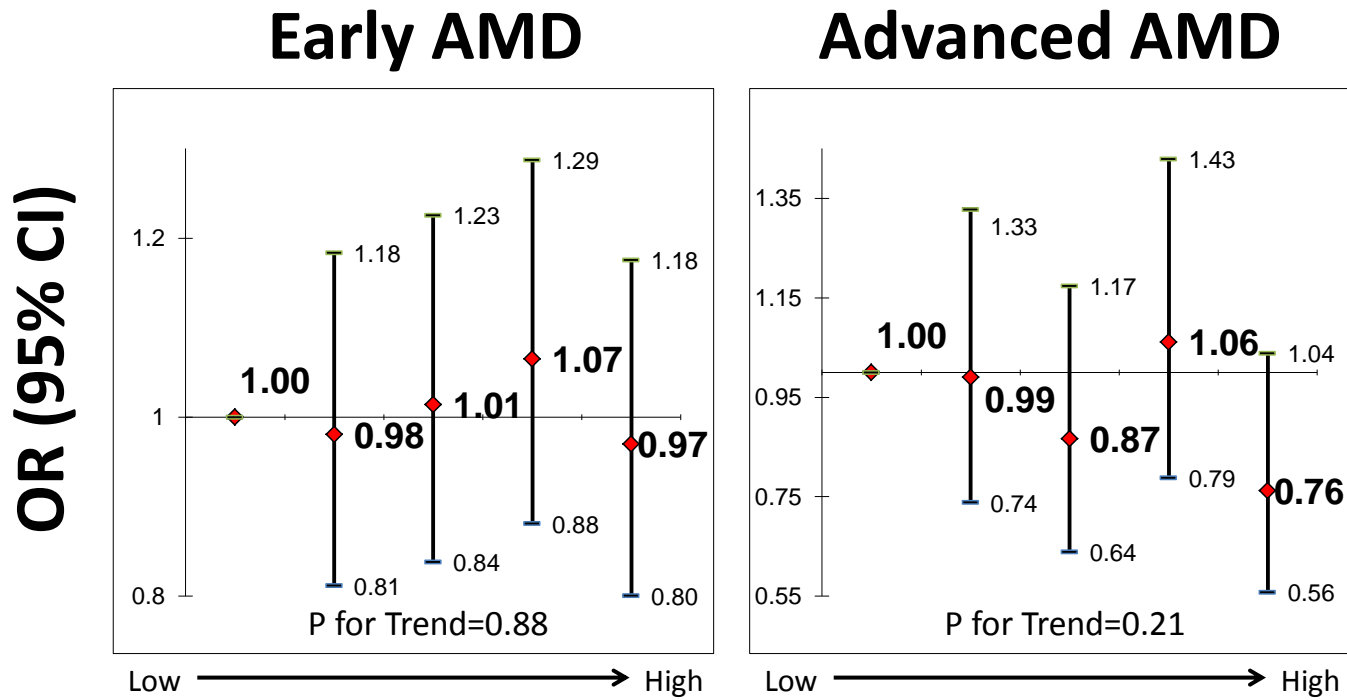

**Factor 5 (Salad Pattern) Score Quintile Groups**

**Legends:**

**Supplementary Figure 6.** Odds ratios (95% confidence intervals) of age-related macular degeneration according to quintile groups of Pizza pattern scores.

Abbreviation: OR, odds ratio; CI, confidence interval; AMD, age-related macular degeneration.

Participants were divided into quintile categories according to their dietary pattern score and those in the lowest 20% of the distribution comprised the referent category. The multivariate-adjusted logistic models using Group 1 (n = 2,739) as control were adjusted for age, sex, race, education, smoking status, alcohol intake, calorie intake, multivitamin use, body mass index, sunlight exposure, hypertension history, lens opacity, and refractive error. The analysis used 4,599 early AMD eyes (1,801 eyes with intermediate drusen plus 2,798 eyes with large drusen, i.e., Group 2 plus Group 3) and 765 advanced AMD eyes (164 eyes with geographic atrophy plus 601 eyes with choroidal neovascularization, i.e., Group 4 plus Group 5). See **AMD grading procedures** in METHODS section for the five (Groups 1~5) AMD grouping criteria.

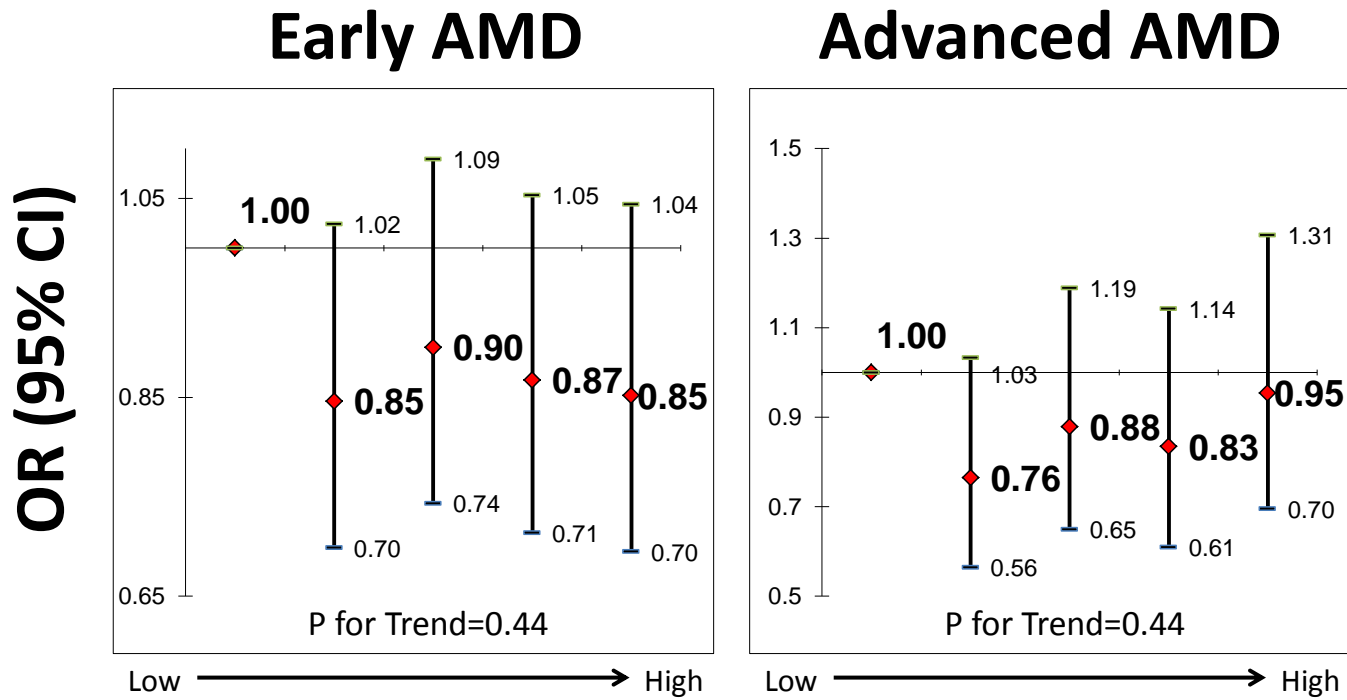

**Factor 7 (Pizza Pattern) Score Quintile Groups**

**Legends:**

**Supplementary Figure 7.** Odds ratios (95% confidence intervals) of age-related macular degeneration according to quintile groups of Alcohol pattern scores.

Abbreviation: OR, odds ratio; CI, confidence interval; AMD, age-related macular degeneration.

Participants were divided into quintile categories according to their dietary pattern score and those in the lowest 20% of the distribution comprised the referent category. The multivariate-adjusted logistic models using Group 1 (n = 2,739) as control were adjusted for age, sex, race, education, smoking status, alcohol intake, calorie intake, multivitamin use, body mass index, sunlight exposure, hypertension history, lens opacity, and refractive error. The analysis used 4,599 early AMD eyes (1,801 eyes with intermediate drusen plus 2,798 eyes with large drusen, i.e., Group 2 plus Group 3) and 765 advanced AMD eyes (164 eyes with geographic atrophy plus 601 eyes with choroidal neovascularization, i.e., Group 4 plus Group 5). See **AMD grading procedures** in METHODS section for the five (Groups 1~5) AMD grouping criteria.

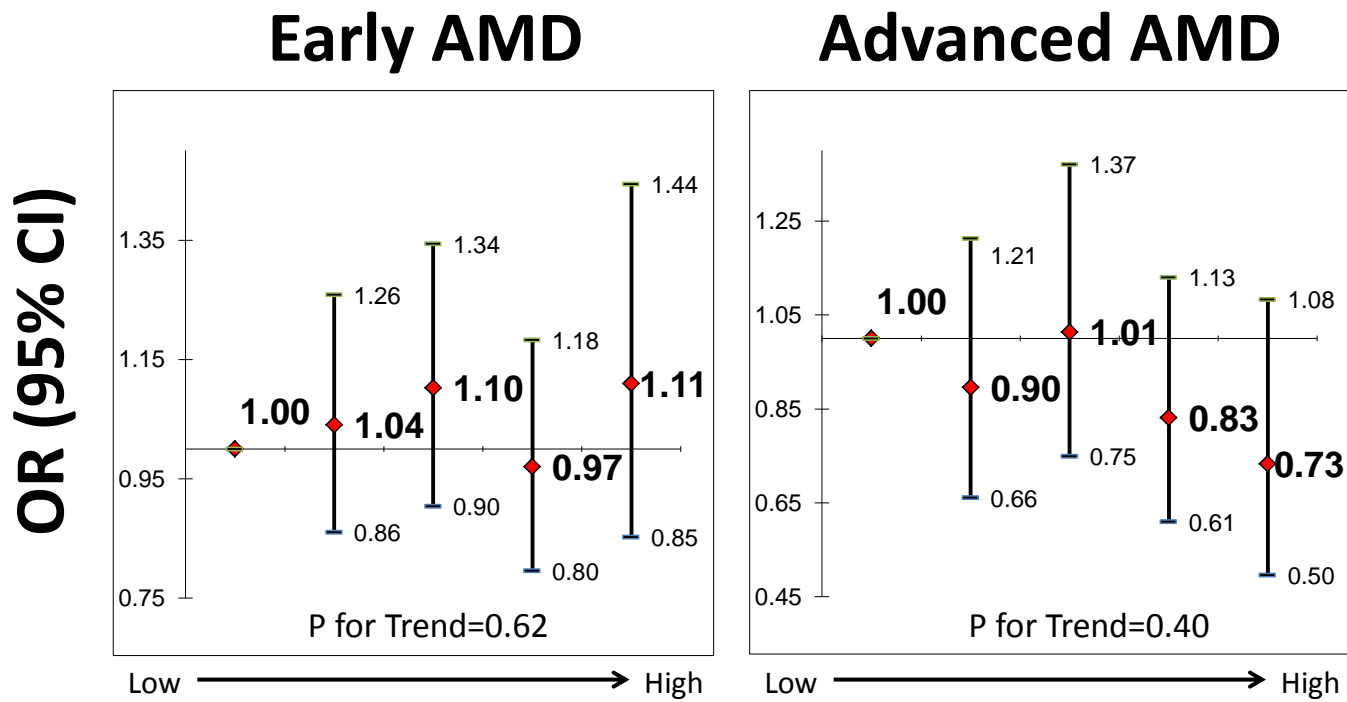

**Factor 9 (Alcohol Pattern) Score Quintile Groups**



**Legends:**

**Supplementary Figure 8.** Odds ratios (95% confidence intervals) of age-related macular degeneration according to quintile groups of Beverage pattern scores.

Abbreviation: OR, odds ratio; CI, confidence interval; AMD, age-related macular degeneration.

Participants were divided into quintile categories according to their dietary pattern score and those in the lowest 20% of the distribution comprised the referent category. The multivariate-adjusted logistic models using Group 1 (n = 2,739) as control were adjusted for age, sex, race, education, smoking status, alcohol intake, calorie intake, multivitamin use, body mass index, sunlight exposure, hypertension history, lens opacity, and refractive error. The analysis used 4,599 early AMD eyes (1,801 eyes with intermediate drusen plus 2,798 eyes with large drusen, i.e., Group 2 plus Group 3) and 765 advanced AMD eyes (164 eyes with geographic atrophy plus 601 eyes with choroidal neovascularization, i.e., Group 4 plus Group 5). See **AMD grading procedures** in METHODS section for the five (Groups 1~5) AMD grouping criteria.

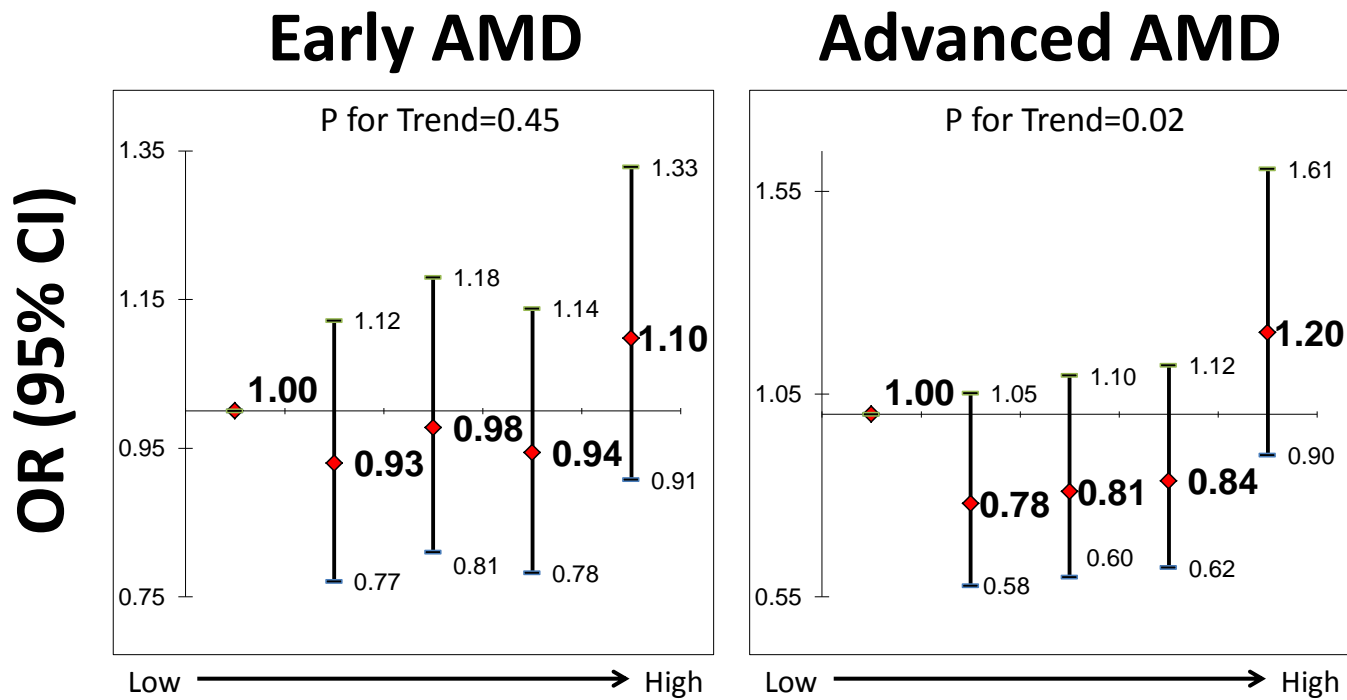

**Factor 10 (Beverage Pattern) Score Quintile Groups**
